# Supplementary material for: Caffeine affects the biological responses of human hematopoietic cells of myeloid lineage via downregulation of the mTOR pathway and xanthine oxidase activity
Source: PubMed Central journal article supplement (PMC4745685; doi:10.18632/oncotarget.5212), 2015-09-11
Supplement: oncotarget-06-28678-s001.pdf [file oncotarget-06-28678-s001.pdf]

## SUPPLEMENTARY FIGURES

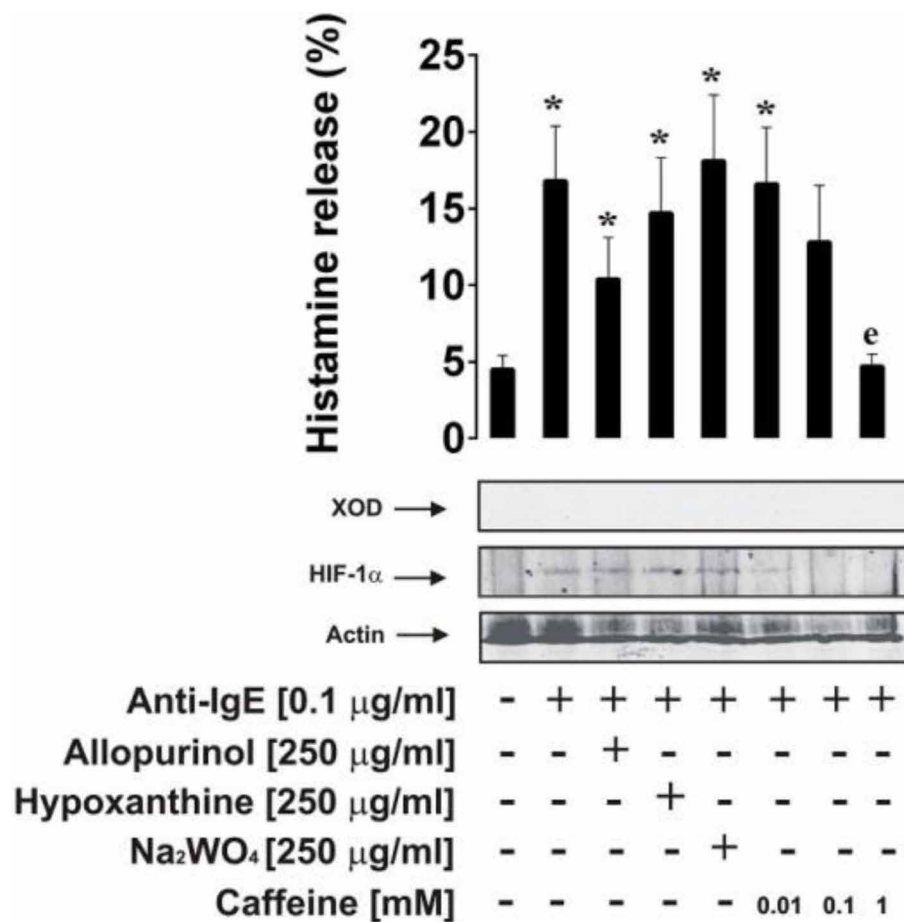

**Supplementary Figure S1: Effects of allopurinol, hypoxanthine, sodium tungstate and caffeine on anti-IgE-induced histamine release and HIF-1 $\alpha$  accumulation in primary human basophils.** Basophils were exposed for 2 h to 0.1  $\mu$ g/ml anti-IgE with or without 30 min pre-treatment with indicated concentrations of inhibitors or hypoxanthine. Western blot data show one representative experiment of three that gave similar results. Quantitative data are shown as means  $\pm$  S.D ; \*  $-p < 0.01$  vs. control ( $n = 3$ ), e  $-p < 0.01$  vs. anti-IgE alone.

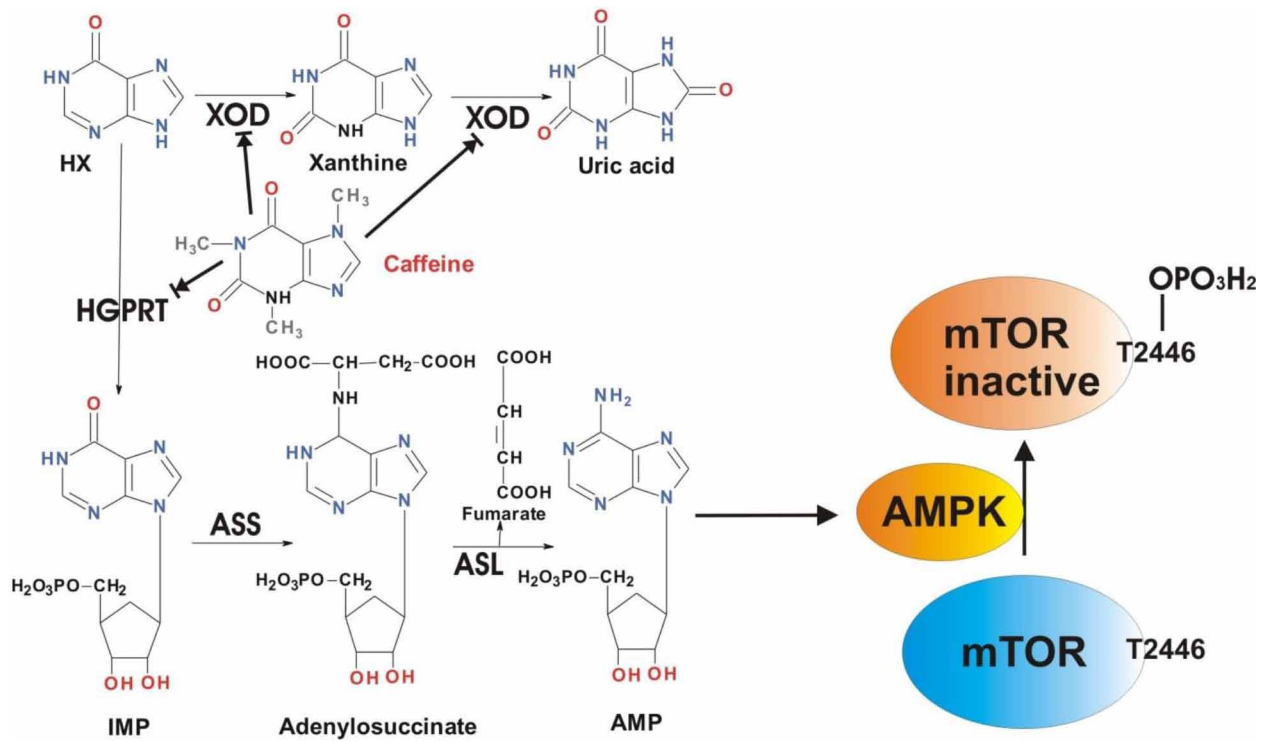

Supplementary Figure S2: Possible biochemical mechanisms of the actions of caffeine on hypoxanthine degradation and re-use. Additional abbreviations used: ASS – adenylosuccinate synthase; ASL – adenylosuccinate lyase.
